## Optical regulation of endogenous RhoA reveals switching of cellular responses by signal amplitude

Jeongmin Ju<sup>1,2</sup>, Lin Ning<sup>3,4</sup>, Hae Nim Lee<sup>1,5</sup>, Hyeyeon Chun<sup>1</sup>, Xin X. Zhou<sup>3,4</sup>, Hyunjoo Ryu<sup>1</sup>, Yong Woo Lee<sup>1</sup>, Austin I. Lee-Richerson<sup>3</sup>, Cherlhyun Jeong<sup>6</sup>, Michael Z. Lin<sup>3,4\*</sup>, Jihye Seong<sup>1-3,5\*</sup>

<sup>1</sup>Brain Science Institute, Korea Institute of Science and Technology, Seoul 02792, Republic of Korea.

<sup>2</sup>Division of Bio-Medical Science & Technology, KIST School, Korea University of Science and Technology, Seoul 02792, Republic of Korea.

<sup>3</sup>Department of Bioengineering, Stanford University, Stanford 94305, CA USA.

<sup>4</sup>Department of Neurobiology, Stanford University, Stanford 94305, CA USA.

<sup>5</sup>Department of Converging Science and Technology, Kyung Hee University, Seoul 02453, Republic of Korea.

<sup>6</sup>Center for Theragnosis, Korea Institute of Science and Technology, Seoul 02792, South Korea.

\*Correspondence: [mzlin@stanford.edu](mailto:mzlin@stanford.edu) (M.Z.L.), [jseong@kist.re.kr](mailto:jseong@kist.re.kr) (J.S.)

### Abstract

Precise control of the timing and amplitude of protein activity in living cells can explain how cells compute responses to complex biochemical stimuli. The small GTPase RhoA can promote either focal adhesion (FA) growth or cell edge retraction, but how a cell chooses between these opposite outcomes is poorly understood. Here, we developed a photoswitchable RhoA guanine exchange factor (psRhoGEF) to obtain precise optical control of endogenous RhoA activity. We find that low levels of RhoA activation by psRhoGEF induces edge retraction and FA disassembly, while high levels of RhoA activation induces both FA growth and disassembly. We observed that mDia-induced Src activation at FAs occurs preferentially at lower levels of RhoA activation. Strikingly, inhibition of Src causes a switch from FA disassembly to growth. Thus, rheostatic control of RhoA activation reveals how cells use signal amplitude and biochemical context to select between alternative responses to a single biochemical signal.

## INTRODUCTION

A fundamental but poorly understood aspect of cellular behavior is how one biochemical signal can generate different outputs depending on molecular or cellular context. For example, overexpression of individual members of the Rho family of small GTPases induces specific actin-based structures, with Cdc42 promoting filopodia formation and extension, Rac1 lamellipodia formation and extension, and RhoA actinomyosin contractility (1). However, experiments with fluorescent reporters have shown that, even within the same cell, individual GTPases are activated at sites and times of seemingly opposite morphological responses. For instance, in migrating cells, RhoA is activated both at the leading edge, which is extending, and at the lagging edge, which is retracting (2-5). Similarly, RhoA is required for focal adhesion (FA) growth in response to various extracellular stimuli (1, 6), but has also been implicated in the reverse process of FA disassembly (7, 8). Given its apparent ability to induce opposing changes, RhoA signaling to FAs could serve as a model system for understanding how a single regulatory protein can produce divergent downstream effects.

While mechanisms from RhoA to FA assembly have been extensively studied (1, 6), much less is known about the mechanisms linking RhoA to FA disassembly. FA formation is a reliable static outcome of many extracellular stimuli, but FA disassembly has primarily been studied in the context of cell migration, when FAs are continuously assembled and disassembled (6). Indeed, localized FA disassembly allows cell regions to detach from their environment and thus is of essential importance in cell migration and cancer metastasis (9). RhoA has been hypothesized to drive lagging edge retraction based on biosensor imaging in migrating cells (2, 5), but it is unclear whether RhoA is responsible for FA disassembly during this process, or how such a function would be reconciled with the better understood function of RhoA in FA growth. The mDia-family proteins and the kinases ROCK1 and ROCK2 (hereafter referred to collectively as mDia and ROCK), two groups of RhoA effectors, have been implicated in FA disassembly based on trailing edge phenotypes in migrating cells perturbed with dominant-negative constructs, RNAi, or chemical inhibitors (7, 8, 10). However, such manipulations disrupt protein function throughout the cell over long periods of time, and mDia and ROCK also have well characterized roles in FA assembly and growth at the leading edge (11-16). Any observed deficits in FA disassembly in migrating cells upon interference with mDia or ROCK function could thus be secondary to earlier deficits in FA growth at the leading edge. Consequently, it has not been possible to specifically perturb RhoA or its effectors to selectively study FA disassembly.

To clearly elucidate molecular mechanisms governing cell responses to specific protein activities, such as FA disassembly in response to RhoA, a method to activate a specific protein separately from other signaling pathways at a particular time would be useful. Here, we report the engineering of a photoswitchable activator of endogenous RhoA, psRhoGEF. By applying different doses of light for rheostatic RhoA activation, we find that lower RhoA activity promotes FA disassembly while higher RhoA activity promotes both FA growth and disassembly. ROCK-family kinases and myosin are required for the RhoA-induced FA disassembly, indicating a role for force in FA disassembly in addition to its well characterized role in FA growth. Interestingly, Src can be activated at FAs specifically in response to lower RhoA activation levels, and inhibition of Src-family kinases shifts the outcome of RhoA activation from FA disassembly to growth. These results thus elucidate a specific role of Src in RhoA-induced FA disassembly, and explain how a biochemical signal can produce opposite outcomes depending on context. They also demonstrate how new optical control of protein activity overcomes limitations of traditional methods in investigating complex cellular behaviors.

## RESULTS

### Strategies for optical control of endogenous RhoGTPases

Previously two general strategies have been devised for optical control of Rho-family GTPase activity. The first strategy involves expressing optically controllable forms of the GTPase itself. For

example, RhoA fused to cryptochrome 2 (CRY2) is clustered by blue light, resulting in its activation by unknown mechanisms (17). Alternatively, RhoA can be sequestered to mitochondria via a protein-protein interaction that occurs in the dark but not in blue light, so that it can be released throughout the cell upon illumination (18). However, these existing methods involve introduction of exogenous Rho-family GTPases over a background of endogenous expression. The addition of more copies of a Rho-family GTPase can lead to unnatural phenotypes, e.g. by overwhelming mechanisms that target endogenous GTPases to specific subcellular locations or by sequestering regulators such as RhoGDIs which are expressed at limited concentrations (19). Specifically, it has been demonstrated that expression of any Rho-family GTPase (Cdc42, Rac, and RhoA) competes with endogenous Rho-family GTPases for binding to RhoGDI-family proteins. Because RhoGDIs sequester the GDP-bound fraction of Rho-family GTPases and protect them from degradation, the introduction of exogenous Rho GTPases results in reduced levels of endogenous GTPases and constitutive activation of the remaining fraction (20, 21) (fig. S1A-B). Thus, introducing additional GTPase molecules can produce artifactual effects on cellular behavior.

A different strategy that may produce fewer artifactual results is to use light to control upstream activators of endogenous Rho-family GTPases, rather than introducing exogenous fusion proteins of the GTPases themselves. Naturally, Dbl family guanine nucleotide exchange factors (GEFs) constitute the primary means by which cells regulate the activity of each Rho-family GTPase (3, 22). Various Dbl-family GEFs catalyze activation of specific Rho-family GTPases by converting the inactive GDP-bound to the active GTP-bound form, which then binds to and activate downstream effectors (23) (fig. S1A). Indeed, RhoA function has been optically modulated by using light-induced heterodimeric interactions such as CRY2-CIBN to increase the concentrations of a RhoGEF at the plasma membrane, where the functional subpopulation of RhoA resides (24-26). However, this involves overexpression of an active form of a RhoGEF throughout the cytosol, which may cause the nonspecific effect prior to light-induced membrane recruitment (26). Alternatively, a single-chain photoswitchable GEF can be made by fusing a GEF catalytic domain to two copies of a photodissociable variant of the green fluorescent protein Dronpa (pdDronpa) so that the active site is caged in the dark (27, 28). Cyan light induces dissociation of the fluorescent protein domains and restoration of GEF activity, after which violet light can induce fluorescent protein domain re-association and protein re-caging. This process is reminiscent of the natural activation mechanism of some GEFs in which an upstream signal induces release of an intramolecular inhibitory interaction (23). By avoiding overexpression of RhoA and the resulting titration of RhoGDIs stabilizing endogenous Rho-family GTPases, this strategy may preserve more native-like signaling states (fig. S1C).

### **Development of photoswitchable GEFs for RhoGTPases**

We thus set out to construct a photocontrollable GEFs for RhoGTPases. A photoswitchable Cdc42 GEF had been previously constructed by fusing photodissociable dimeric Dronpa (pdDronpa) fluorescent protein domains to each end of the Dbl-homology (DH) domain of intersectin, followed by a CAAX sequence for localization to the plasma membrane (27, 28). Baseline dimerization of pdDronpa sterically blocks the intersectin active site, while illumination causes pdDronpa dissociation and allows intersectin to bind to and activate Cdc42 (27, 28). We investigated whether this design could be optimized and generalized. We first optimized the photoswitchable intersectin by testing pdDronpa variants and linker lengths for light-induced filopodia formation, finding an improved variant we termed psCdc42GEF (fig. S2). psCdc42GEF robustly mediated filopodia formation on the whole cell area after photostimulation by 500-nm light. We then created a photoswitchable Rac GEF (psRacGEF) using the DH domain of Tiam1 (fig. S3). psRacGEF robustly mediated lamellipodia ruffling when activated with cyan light (Movie S1).

We finally attempted to create a photoswitchable RhoA GEF based on the RhoA-specific activator PDZRhoGEF (PRG) (29, 30). Previous *in vitro* findings mapped specificity determinants to only the PRG DH domain (30), so we first tested constructs in which photodissociable Dronpa domains (tetrameric DronpaN or dimeric pdDronpaM) were attached to both termini of the PRG

DH domain, similarly to psCdc42GEF and psRacGEF. However, HEK293A cells expressing these constructs produced a variety of responses to light, including filopodia formation and cell spreading (fig. S4A,B), suggestive of Cdc42 and Rac activation. These findings indicated that the DH domain alone in PDZRhoGEF is not sufficient to impart specificity for RhoA over other GTPases in cells, in contrast to the DH domains of the Cdc42 GEF intersectin or the Rac GEF Tiam1.

We thus explored whether other elements in PRG could confer RhoA specificity in cells. While ITSN and Tiam1 specifically bind to their substrates using only the DH domain (fig. S2A, S3A), the crystal structure of the RhoA-PRG complex shows both the DH and PH domains of PRG contacting RhoA (Fig. 1A) (31, 32). In addition, a “GEF switch” sequence immediately upstream of the PRG DH domain has also been suggested to interact with RhoA and contribute to its activation (31). Indeed, constructs in which the switch sequence, DH domain, and PH domain were flanked by pdDronpaM or its higher-affinity derivative pdDronpaV (Fig. 1B) demonstrated RhoA-specific effects upon illumination (fig. S4A,B). Finally, we optimized linker lengths while testing the photodissociable pairs of pdDronpaV-pdDronpaV, pdDronpa1-pdDronpa1, and pdDronpa1-pdDronpa1 N145K (fig. S4C), which form a series with decreasing affinity (28). pdDronpaV-PRGsDHPH-GSS<sub>1</sub>-pdDronpaV was most reliable in inducing cell contraction and was designated psRhoGEF (fig. S4D).

psRhoGEF-induced acute RhoA activation resulted in immediate and strong cellular contraction in HEK293A cells (Fig. 1C-D and Movie S2). psRhoGEF with an inactivating R868G mutation (29, 30) failed to induce contraction (Fig. 1D), confirming the cellular response of psRhoGEF is indeed due to interaction with RhoA upon illumination. Finally, pdDronpaV fluorescence was restored and psRhoGEF effects were reversed with 400-nm light (Fig. 1E-G).

For comparison, we also tested two other optobiochemical systems for RhoA activation, OptoGEF-RhoA (26) and photo-recruitable (PR)-GEF (25). In OptoGEF-RhoA, a light-induced CRY2-CIBN interaction (26), while in PR-GEF, the PDZ-LOVpep interaction (25) (fig. S5A). We noticed we needed to reduce OptoGEF-RhoA and PR-GEF plasmid amounts to prevent baseline cell contraction in HEK293A cells, but once this was done (fig. S5B), both OptoGEF-RhoA and PR-GEF mediated cell shrinkage upon illumination (fig. S4B-C, S5C). Thus, all three optobiochemical systems functioned effectively. One point of difference between the systems was reversibility; after illumination was terminated, the light-induced localization of PR-GEF and OptoGEF-RhoA immediately reversed (fig. S6A-B). In contrast, psRhoGEF remained in its uncaged conformation for over 25 min, while 400-nm of illumination immediately returned it to its caged state (fig. S6C-D). We proceeded to perform experiments with psRhoGEF as its performance was less affected by expression conditions in our hands, and as its single-chain nature simplified co-expression with other constructs.

### **Acute RhoA activation is sufficient for neuronal growth cone retraction**

We used psRhoGEF to determine whether acute activation of RhoA is sufficient for axon retraction during neuronal differentiation. In developing neurons, repellent cues induce local RhoA activation in growth cones (33). RhoA activity is required for growth cone retraction in response to these cues (34), presumably by inducing actinomyosin contraction (35, 36). However, it has been unclear whether activation of endogenous RhoA alone is sufficient to induce growth cone retraction, as the receptors for repellent cues activate additional signaling pathways as well (37).

To address this question, we expressed psRhoGEF in embryonic rat hippocampal neurons and locally illuminated migrating growth cones with 500-nm light (fig. S7A). We observed that illumination of forward-migrating growth cones immediately induced their backward movement, with retraction persisting for at least 20 min after illumination (fig. S7B, Movie S3). Overall, 60% of psRhoGEF-expressing growth cones demonstrated retraction at 20 min. In contrast, neurons expressing monomeric Dronpa145K did not show an immediate response to light (Movie S4), and demonstrated retraction 20 min later in only 13% of cases, a statistically significant difference (fig. S7C). These results demonstrate that a local increase in RhoA activity is sufficient to induce growth cone retraction, as proposed in a model of axon guidance receptor signaling (35, 36).

### **Dose-dependent effects of RhoA activation on focal adhesion dynamics**

RhoA has well established functions in promoting focal adhesion (FA) formation, but its potential role in FA disassembly is less clear. Following early observations that microinjection of RhoA induces FA formation in confluent fibroblasts (1), multiple experiments have established that RhoA and its ROCK effectors are required for FA induction by extracellular stimuli such as LPA or growth factors (11, 12, 38). If FA disassembly is considered as the reverse of FA assembly, then it might be expected that RhoA activation would inhibit FA disassembly. Indeed, chronic activation of RhoA was found to inhibit FA disassembly in fibroblasts, whereas chronic inhibition of RhoA induced FA disassembly (39). In addition, acute pharmacological inhibition of ROCK or myosin II, which is activated by ROCK, induces FA disassembly (15, 40), consistent with a role for myosin II in maintaining FAs. On the other hand, other experiments suggest a function for RhoA activation in FA disassembly with faster kinetics. Microinjection of RhoA induces rapid contraction of subconfluent fibroblasts (41). We also observed that photoinduction of psRhoGEF induced rapid shrinkage of subconfluent HEK293A cells (Fig. 1C-D).

We hypothesized that acute RhoA activation can induce FA disassembly during cell retraction. To test this, we expressed psRhoGEF in U87-MG astrocytoma cells, and visualized FAs with mCherry-tagged paxillin before and after illumination of 500-nm light. Indeed, we observed that acute RhoA activation induced FA disassembly at the retracted region within 30 min (Fig. 2A, Movie S5). We further investigated the effect of different RhoA level on FA dynamics, taking advantage of the easy dosability of light. Applying different light intensities to induce different levels of RhoA activation (Fig. 2A-C), we found unexpectedly that lower light doses favored FA disassembly and cell contraction (Fig. 2D-E). In contrast, illumination with higher light doses induced FA enlargement in non-retracting areas together with FA disassembly from retracting areas (Fig. 2A), so that mean integrated FA area remained unchanged (Fig. 2E). Categorization of cells by their FA response to the higher light dose showed significant fractions responding with increasing or decreasing FA area (Fig. 2F). DronpaK-expressing cells showed no changes in total cell area, total FA area, or the occurrence of FA growth or shrinkage at either light dose (Fig. 2G-J), confirming the effects required RhoGEF activity. Thus, we observed that psRhoGEF-induced acute RhoA activation can cause FA disassembly and cell contraction, and this cellular function of RhoA is favored under lower light doses.

If the FA disassembly we observed was directly due to RhoA, and not secondary to a coordinated cell-wide changes such as enhanced migration, we would expect that local RhoA activation would lead to FA disassembly selectively in that region. Indeed, local psRhoGEF illumination often caused FA disassembly selectively in the illuminated region, and was never observed to cause FA disassembly outside the illuminated region (Fig. S8).

### **ROCK activity and actomyosin contractility are required for both FA assembly and disassembly**

We next investigated the downstream signaling pathways mediating this dose-dependent function of RhoA on FA dynamics. ROCK has well established functions as RhoA effectors mediating FA growth. ROCK phosphorylates and inactivates myosin light chain phosphatase, resulting in myosin light chain phosphorylation, myosin II activation, and increased actomyosin contractility (42). First, we measured the activity of ROCK depending on light doses, and as expected, higher light doses applied on psRhoGEF induced stronger ROCK activation (Fig. 3A). As expected, illumination of psRhoGEF also induced phosphorylation of myosin light chain (Fig. S9). ROCK activity and actomyosin contractility have established roles in RhoA-induced FA growth and maturation (16). Indeed, FA size was significantly reduced in cells treated with the ROCK inhibitor Y-27632 or the myosin II inhibitor blebbistatin (Fig. 3B-C). Treatment with Y-27632 or blebbistatin also prevented FA growth induced by strong psRhoGEF activation (Fig. 3D-E), suggesting the FA growth after strong psRhoGEF activation is dependent on ROCK and myosin II. Interestingly, inhibition of ROCK and myosin II also prevents the FA disassembly and cell shrinkage that is observed at lower rates with strong psRhoGEF activation (Fig. 3F-G). These results indicate that RhoA-mediated ROCK activity is crucial for FA disassembly as well as FA growth. Indeed, time-lapse imaging of FA disassembly after RhoA activation revealed centripetal

stretching of FAs prior to their removal, indicating a role for actin contractility (Movie S5). Consistently, FA disassembly induced by low-intensity activation of psRhoGEF was also prevented by ROCK or myosin II inhibitors (Fig. 3H, fig. S10). These results indicate that ROCK and myosin activities are required for RhoA-induced FA disassembly, in addition to their well characterized roles in FA growth.

### **RhoA recruits Src to FAs in a dose-dependent manner, producing opposite outcomes**

We next asked whether FA growth vs. disassembly outcomes induced by different RhoA activity levels are due to differential activation of other downstream molecules. One effector of RhoA is mDia1, which mediates recruitment to FAs of Src kinase (8), whose activity is necessary for FA disassembly in migrating cells (8, 9). (43, 44) Src phosphorylation of the FA components p130Cas and cortactin has been shown to accelerate their dissociation from FAs and be required for FA turnover in migrating cells (43-45).

We thus investigated the effect of different RhoA levels on the Src activity at FAs after illumination of psRhoGEF-expressing cells with different light doses. Strikingly, the lower level of psRhoGEF activation induced Src activation at FAs more efficiently (Fig. 4A-B), without altering total Src distributions (fig. S11). These results imply that FA disassembly by weak RhoA activation may be due to the more efficient Src activation at FAs. To test this hypothesis, we examined the effects of perturbing Src activity on the response of FAs to low level of RhoA activation. Indeed, FA disassembly, induced by low light dose on psRhoGEF, was prevented by pretreatment of a Src inhibitor PP2 (Fig. 4C, Fig. S12A-B, fig. S10).

We further wondered the roles of active Src on the FA disassembly, induced by high light dose on psRhoGEF. We observed that application of the Src inhibitor PP2 or expression of dominant-negative Src K295R blocked FA disassembly after psRhoGEF photoinduction (Fig. 4D-H, fig. S12C, Movie S6). In fact, some FAs appeared to grow inwards while still being attached to their original position at the edge of the cell (Fig. 4D, fig. S12C, Movie S6). Correspondingly, photoinduction of psRhoGEF under PP2 incubation increased the overall FA area per cell (Fig. 4H). In contrast, increasing Src activity by expression of a constitutively active Src Y527F resulted in the faster rate of cell shrinkage and focal adhesion loss in response to psRhoGEF (fig. S12D-E). These results demonstrate that Src activity is required for RhoA-induced FA disassembly, and that inhibition of Src activity is sufficient to switch the response of FAs to RhoA activation from disassembly to growth.

### **RhoA induces cell retraction at regions of low basal RhoA activity**

Upon global light stimulation of psRhoGEF, one side of the cell also remained attached while the other side retracted with FAs in the retracting region disappearing within 30 min (Fig. 1C, 2A, 3D, 4D, Movie S5). As we found lower light doses favored FA disassembly (Fig. 2), we wondered whether edge retraction of a given cell by global light stimulation could be related to underlying asymmetry in basal RhoA activity in the cell.

To examine spatial distributions of RhoA activity in living cells expressing psRhoGEF, we created a RhoA FRET biosensor that could be imaged without interference by the cyan light used to induce psRhoGEF. The Large-Stokes-Shift orange fluorescent protein LSSmOrange and the far-red mKate2 are an appropriate FRET pair, which are minimally excited at the 500-nm wavelengths used to induce psRhoGEF. Thus we created a RhoA biosensor composed of LSSmOrange, the rhotekin RBD, a long linker, mKate2, and RhoA, modifying a previous design that had used cyan and yellow fluorescent proteins (46) (Fig. 5A-B).

To test the activity and specificity of our RhoA biosensor, we compared FRET levels in cells expressing DronpaK only, PRG DHPH fused to DronpaK, ITSN-DH, Tiam-DH or PRG DHPH alone. FRET was significantly higher in cells expressing the PRG DHPH domains (Fig. 5C-D), indicating this sensor responds to RhoGEF with increased FRET (Fig. 5A). In contrast, the biosensor did not respond to ITSN or Tiam (Fig. 5C-D), confirming specificity for activation by RhoGEFs. We also generated constitutively active or inactive biosensors by introducing G14V or T17N mutations in the RhoA domain, respectively (Fi

g. 5E). As expected, the RhoA G14V biosensor exhibited higher FRET level than the RhoA T17N biosensor (Fig. 5F-G).

We then introduced the wild type biosensor (WT) or negative mutant T17N biosensor together with psRhoGEF. Illumination caused increased FRET in the WT but not T17N biosensor (Fig. 6A-B), as expected. Interestingly, the biosensor responded in a dose-dependent manner to light (Fig. 6C), verifying that psRhoGEF enables rheostatic control of RhoA activity. Finally, this FRET response was observed after the illumination of psRhoGEF, but not its negative mutant R868G (Fig. 6D-E).

Strikingly, visualization of RhoA activity distributions using the new RhoA biosensor revealed significantly lower RhoA activity at cell edges that subsequently retract upon psRhoGEF stimulation (Fig. 6D and 6F). These results suggest that underlying asymmetry of RhoA activity may determine which region of a given cell retracts after further acute global RhoA activation. We note however, that this association may be a mixture of effect-effect and cause-effect relationships. For example, more recently extended edges of the cell may have younger and smaller FAs and thereby contain lower concentrations of integrins and native RhoGEFs. These younger FAs may already be more likely to undergo disassembly than older FAs.

In summary, our results imply that RhoA activation can regulate downstream pathways in a dose-dependent manner: Low-level activation efficiently induces rapid Src phosphorylation at FAs leading to FA disassembly. In contrast, high-level RhoA activation strongly induces phospho-ROCK and more slowly induces phospho-Src. This leads to a balanced response of FA growth and disassembly, which can be biased toward FA growth by Src inhibition (Fig. 7). It has been suggested that RhoA has different affinity to each downstream effectors; RhoA-mDia and RhoA-ROCK complexes exhibit dissociation constants of 6 and 130 nM respectively (47). Thus, low concentrations of active RhoA could selectively activate mDia signaling to Src to induce FA disassembly. In contrast, high levels of active RhoA may additionally activate ROCK to induce stronger actomyosin contractility and FA growth. In conclusion, our results revealed that FA dynamics can be controlled by amplitude-modulation of RhoA activity via differential activation of downstream pathways.

## DISCUSSION

In this study, we developed a single-chain photoswitchable activator of RhoA using a photodissociable dimeric variant of the fluorescent protein Dronpa. Using psRhoGEF to rapidly and selectively activate RhoA, we confirmed that acute RhoA activation at lower levels can induce FA disassembly, and dissected downstream pathways involved in this response. We found that both ROCK and Src kinase are required for the RhoA-induced FA disassembly, but Src activation at FAs is more efficiently induced by lower levels of RhoA. Finally, inhibition of Src activity switches the response of FAs to RhoA activity from disassembly to enlargement. Thus RhoA activity-dependent activation of Src at FAs mediates the decision between the opposite outcomes of FA growth versus disassembly (Fig. 4H).

While functions of RhoA effectors such as the ROCK and mDia in FA growth are well characterized (16), their roles in FA disassembly have been much less studied. For example, FAs shrink or disappear upon inhibition or depletion of ROCK or mDia (16). The same proteins have been implicated in FA disassembly based on more complex experiments examining rates of FA disassembly at the lagging edge of migrating cells where FA disassembly can be reliably observed (6-8, 10, 16). However, ongoing migration itself requires polarization of cells and FA assembly at the leading edge, processes that also require RhoA effectors (6). Thus, chronic and global manipulations of these pathways cannot unambiguously reveal direct roles for RhoA effectors in FA disassembly vs. secondary roles via affecting migration. In contrast to the use of dominant-negative or constitutively active constructs, or stimulation by extracellular stimuli, optical induction of psRhoGEF allows control of endogenous RhoA with tight temporal control and without activation of other signaling pathways. This allows immediate responses to RhoA

activation to be assessed without feedback or crosstalk.

Our observation that cells can convert rheostatic RhoA signaling into opposite FA responses provides an example of how the same signal can be used to create distinct outcomes via amplitude encoding. Interestingly, RhoA may also be involved in the ability of neurons to respond to different concentrations of the chemokine SDF-1 $\alpha$  by either enhancing or inhibiting axonal growth. While both responses require RhoA, enhancement or inhibition requires mDia or ROCK, respectively (48). However, in these earlier experiments, individual signaling proteins could not be specifically activated, and biological pathways could only be activated by SDF-1 $\alpha$  application, whose downstream effects have not been comprehensively mapped. Thus, whether RhoA activity levels determine the response switch, or whether the SDF-1 $\alpha$  receptor CXCR4 engages different signaling pathways depending on the size of the activated receptor population, could not be ascertained. In our current experiments, by directly modulating RhoA activity levels, we were able to determine that RhoA activity amplitude alone is sufficient to drive a switch between two different outcomes.

Another case of opposing responses resulting from different levels of activity of a single protein is provided by another family of small GTPases, the Ras family. Here, a low level of Ras activity induces proliferation of mammalian cells through activation of various effectors that promote protein synthesis and transcription of growth-promoting genes, whereas a high level of Ras activity caused by Ras mutation or amplification induces transcription of the cell cycle inhibitor p16 and growth arrest (49). However, this switch in Ras function occurs only upon mutation or amplification of Ras, a permanent genetic change, and thus cannot be dynamically regulated. In contrast, the amplitude modulation of RhoA function we observed provides a mechanism by which pathway inputs can dynamically select between alternative outputs. In other known examples of amplitude-dependent outcomes, it has not yet demonstrated that amplitude-modulation of a single intracellular signal can select between two induced outcomes (as opposed to a simple response vs. no-response decision). For example, in mammalian chondrocytes and *Xenopus* embryos, a low level of extracellular Wnt activates calcium release from internal stores, while a high level activates the  $\beta$ -catenin pathway (50). However, the mechanism behind this switch appears to be concentration-dependent utilization of different Wnt receptors, and thus response selection occurs outside rather than inside the cell. In *Drosophila* embryos, different concentrations of an epidermal growth factor homolog produce different levels of Ras activity, leading to a binary choice between transcription or no transcription (51), but in this case, one of the outcomes is identical to the default unstimulated state.

Finally, the photoswitchable GEFs described here should be broadly useful tools for investigating the functions of endogenous Cdc42, Rac1, and RhoA. For example, experiments comparing the functions of these GTPases can now be performed with a consistent set of conditions. Photoswitchable GEFs should also enable spatiotemporal control of any combination of Cdc42, Rac1, or RhoA through the expression of the corresponding combination of photoswitchable GEFs. This enables simpler experimental designs compared to methods that utilize light-induced heterodimerization to recruit GEFs to the membrane (24-26). In addition, unlike optically controlled fusion proteins of Rho GTPases, these photoswitchable GEFs should avoid artifactual effects arising from the titration of a limiting number of RhoGDI molecules (20). We thus expect that psCdc42GEF, psRacGEF, and psRhoGEF will be widely useful for investigating the functions of Rho-family GTPases with high spatiotemporal specificity and with minimal perturbation to signaling networks.



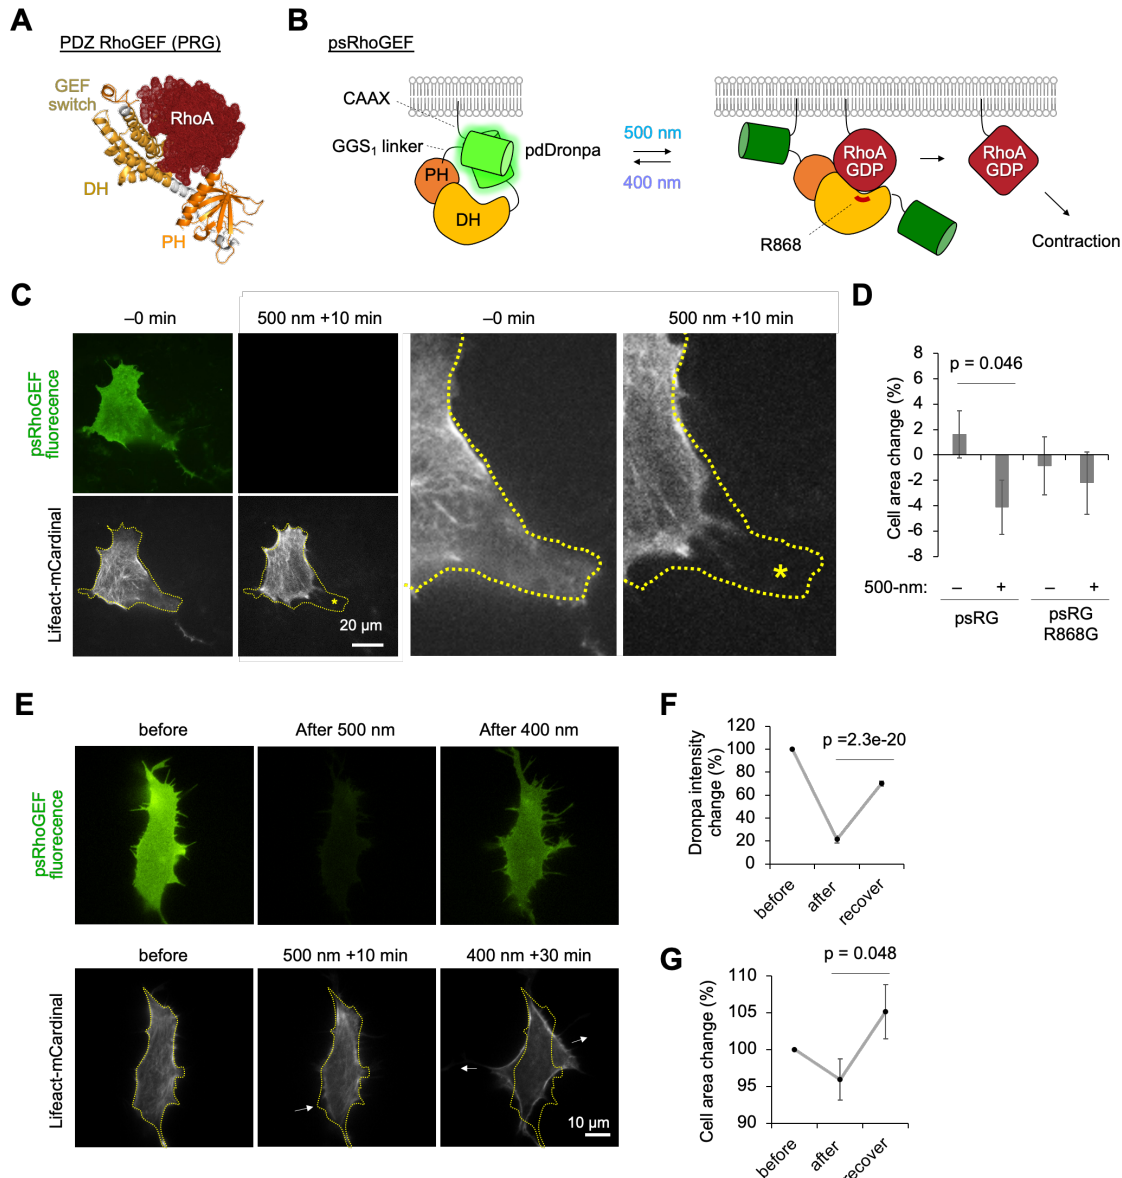

**Fig. 1. Photoswitchable RhoGEF demonstrates that acute RhoA activation induces cell retraction.**

(A) Co-crystal structure of PDZ RhoGEF (PRG) and RhoA (PDB 3T06). (B) Photoswitchable RhoGEF comprises the PRG RhoA-interacting regions (GEF switch, DH domain, and PH domain) fused to a pdDronpaV domain at each end with a C-terminal CAAX sequence. (C) Native fluorescence of pdDronpa in psRhoGEF and Lifact-mCardinal before and after 500-nm light stimulation, showing induced cell retraction. An area was enlarged (right) to better visualize the retracted edge of the cell. A dotted line indicates original cell outline, and an asterisk indicates the region of the cell that has retracted. The experiment was repeated >10 times. See also Supplementary Fig. 4. (D) Illumination-induced cell area change was observed in cells expressing psRhoGEF, but not psRhoGEF-R868G ( $n = 39, 34, 41$  or  $47$ ,  $p = 0.046$ , by two tailed Student's t-test). (E) Native fluorescence of pdDronpa in psRhoGEF (upper panels) and Lifact-mCardinal (lower panels), before (left), after 500-nm stimulation (middle), and the subsequent illumination of 400-nm light (right). A dotted line indicates original cell outline and white arrow indicates the region of the cell that has changed. (F and G) The normalized intensity change of pdDronpa in psRhoGEF (F) and cell size change (G), after 400-nm light and the subsequent 500-nm light illumination ( $n = 45$ ,  $p$  values were estimated by two tailed Student's t-test).

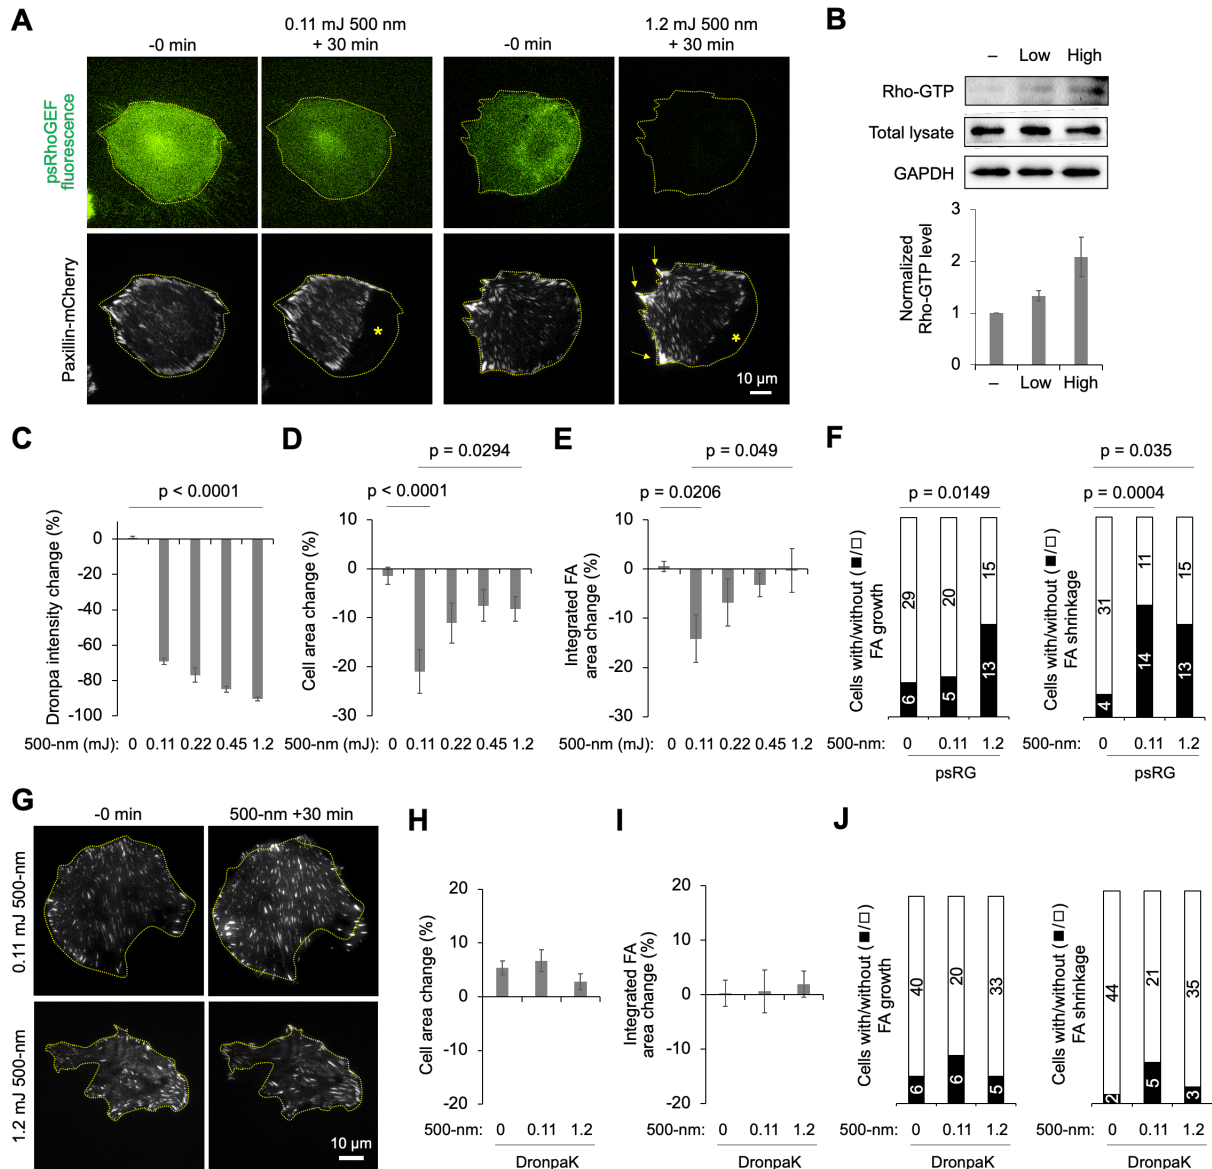

**Fig. 2. Focal adhesion responses to psRhoGEF depend on activity level.**

(A) The representative psRhoGEF and paxillin-mCherry images, before and 30 min after illumination of different light doses. (B) RhoA pull-down assay confirmed different levels of active RhoA (Rho-GTP) by different light doses on psRhoGEF-expressing cells ( $n = 4$ ). (C) Different magnitude of 500-nm light induces different level of off-switched psRhoGEF. P-value was calculated by one-way ANOVA test ( $n = 37, 25, 18, 17$  or  $28$ ). (D and E) The changes of cell size (D) and total FA area (E) in psRhoGEF-expressing cells in a 30-min interval without or with different doses of illumination ( $n = 37, 25, 18, 17$  or  $28$ ). Statistical significance was calculated by Tukey's multiple comparisons test. (F) Proportion of psRhoGEF-expressing cells exhibiting FA growth or FA shrinkage in 30 minutes after different light doses ( $n = 35, 25$  or  $28$ ). All p values were calculated by Fisher's exact test. (G) Representative images of paxillin-mCherry in the DronpaK-expressing U87-MG cells before and after light stimulation of different light dose. (H and I) Changes in cell size (H) and total FA area (I) in the DronpaK-expressing cells in a 30-min interval after illumination or without illumination ( $n = 46, 26, 38$ ). Data are represented as mean  $\pm$  s.e.m. (J) Proportion of the DronpaK-expressing cells exhibiting FA growth or FA shrinkage in 30 minutes after illumination ( $n = 46, 26, 38$ ).

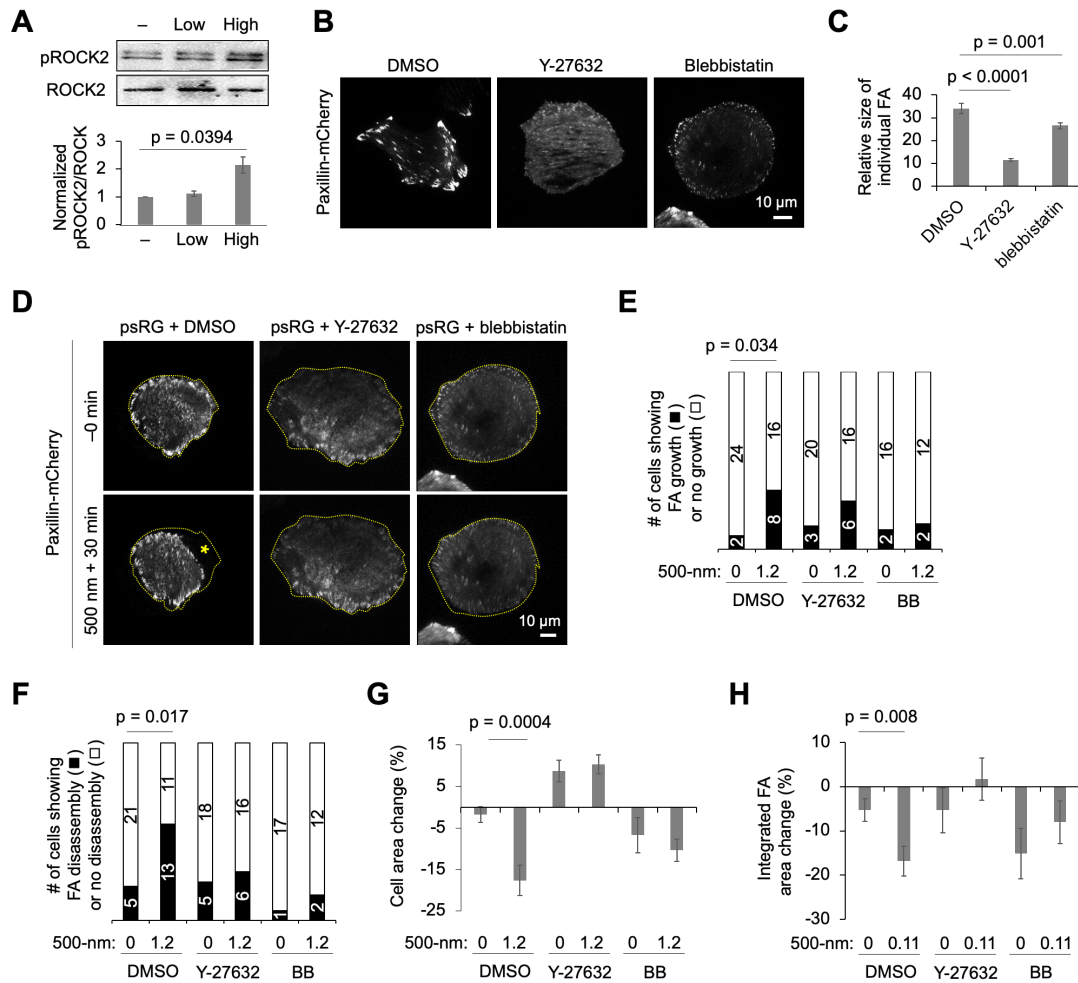

**Fig. 3. ROCK activity and actomyosin contractility are required for both FA assembly and disassembly.**

(A) Levels of phosphorylated-ROCK2 (p-ROCK2) in U87-MG cells expressing psRhoGEF before or after different light doses. pROCK2 was quantified relative to ROCK2. ANOVA was performed and statistical differences were calculated by post-hoc Dunnett's test ( $n = 4$ ). (B) Representative images of FAs, labelled by paxillin-mCherry, in psRhoGEF-expressing cells incubated with DMSO, 10  $\mu$ M ROCK inhibitor Y-27632, or 2  $\mu$ M myosin II inhibitor blebbistatin (BB) for 30 min. (C) Quantitation of FA sizes. For multiple comparisons between groups, ANOVA was performed and statistical differences were calculated by post hoc Dunnett's test ( $n=18, 23$  or  $14$ ). (D) Representative paxillin-mCherry images in the psRhoGEF-expressing cells preincubated with DMSO, Y-27632 or BB for 30 min, in a 30-min interval without or after high dose of illumination. A dotted line indicates original cell outline, and an asterisk indicates the region of the cell that has retracted. (E and F) Cell proportions exhibiting FA enlargement (E) or FA disassembly (F) in 30 min without or after high dose of illumination, assessed by Fisher's exact test ( $n = 26, 24, 23, 22, 18$ , or  $14$ ). (G) The changes in cell size in psRhoGEF-expressing cells preincubated with DMSO, Y-27632 or BB for 30 min, in a 30-min interval without or after high dose of illumination, assessed by two-tailed Student's t-test ( $n = 26, 24, 23, 22, 18$ , or  $14$ ,  $p = 0.004$  by two-tailed Student's t-test). (H) Total FA area change in psRhoGEF-expressing cells treated with DMSO, Y-27632 or BB for 30 min, in a 30-min interval without or with low dose of illumination ( $p = 0.02$  by two-tailed Student's t-test,  $n = 71, 26, 23, 21, 13$  or  $20$ ).

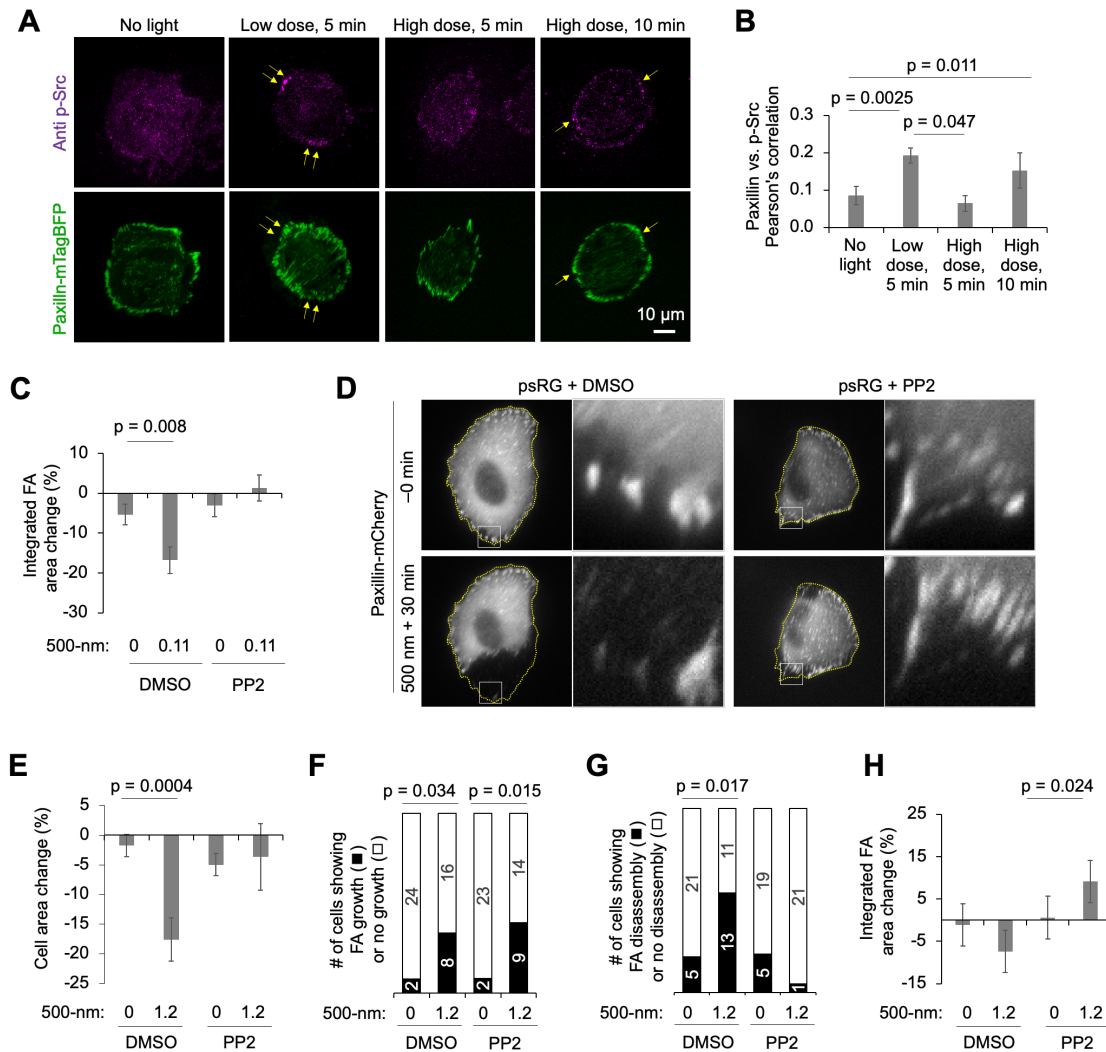

**Fig. 4. Src is recruited to focal adhesions by low level RhoA activation and mediates their disassembly.**

(A) Representative images showing differential recruitment of active p-Src at focal adhesions (labelled by paxillin-mTagBFP) upon different doses of illumination for indicated times. (B) Co-localization of paxillin and p-Src is estimated by the Pearson's correlation coefficient. All p-values were calculated by two tailed Student's t-test ( $n = 15, 16, 12$  or  $8$ ). (C) Total FA area change in psRhoGEF-expressing cells pre-treated with DMSO or  $10 \mu\text{M}$  PP2 for 30 min, in a 30-min interval without or with low dose of 500-nm light illumination ( $p = 0.008$ , two-tailed Student's t-test,  $n = 71, 26, 56$  or  $37$ ). (D) Representative images of FAs (labelled by paxillin-mCherry) in psRhoGEF-expressing U87-MG cells before and 30 min after high dose of illumination, with preincubation of DMSO or  $10 \mu\text{M}$  PP2 for 30 min. Peripheral FAs in the boxed areas are shown with higher magnification on the right. (E) The changes of cell size in psRhoGEF-expressing cells treated with DMSO or  $10 \mu\text{M}$  PP2 for 30 min, in a 30-min interval without or with low dose of 500-nm light illumination ( $p = 0.0004$ , two-tailed Student's t-test,  $n = 26, 24, 56$  or  $21$ ). (F and G) Proportion of PP2-treated psRhoGEF-expressing cells exhibiting FA enlargement (F) or FA disassembly (G) in 30 min after or without high dose of illumination. Illumination induces FA enlargement only under PP2 treatment ( $p = 0.014$ , by Fisher's exact test,  $n = 26, 24, 25$  or  $23$ ). (H) Total FA area change in psRhoGEF-expressing cells treated with DMSO or  $10 \mu\text{M}$  PP2 for 30 min, in a 30-min interval without or with high dose of 500-nm light illumination. Strong RhoA activation caused an increase in overall FA area ( $p = 0.024$ , two-tailed Student's t-test,  $n = 26, 24, 25$  or  $23$ ).

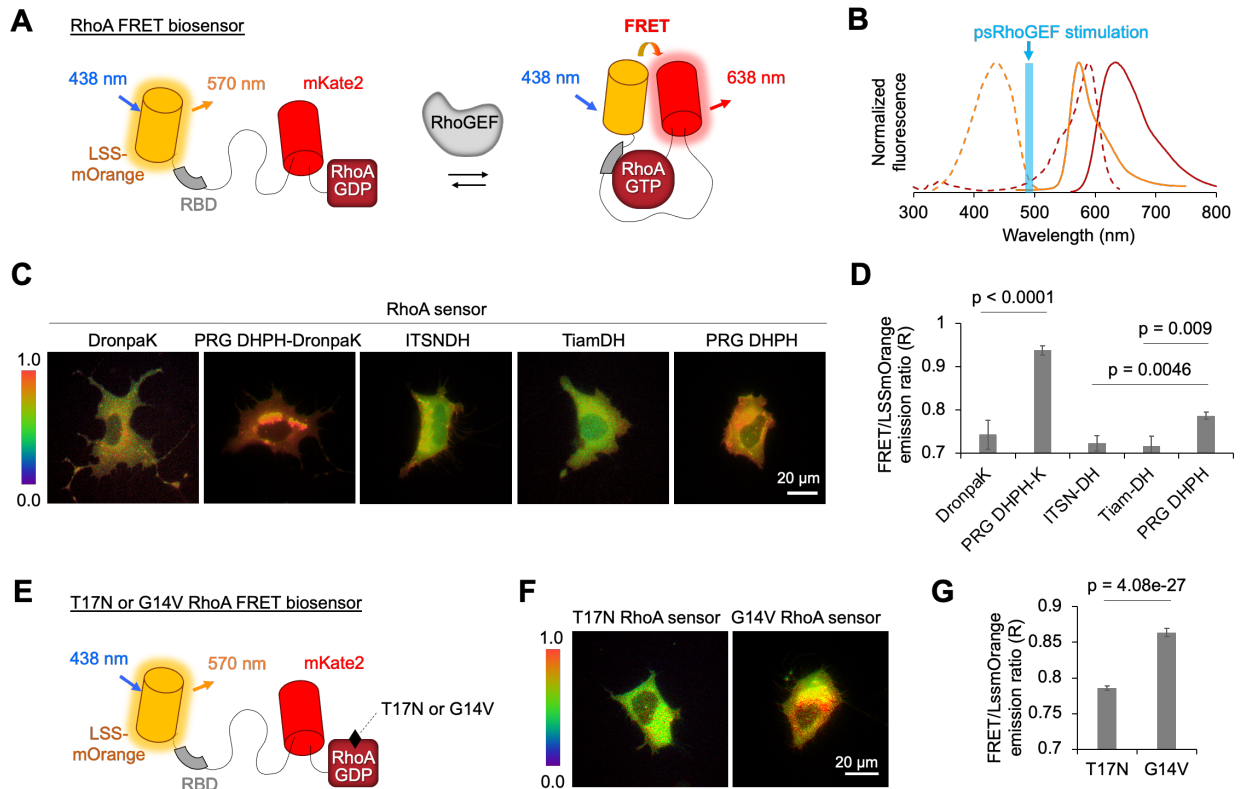

**Fig. 5. The RhoA biosensor with LSS-mOrange/mKate2 as a FRET pair.**

(A) The schematic design of a RhoA biosensor with a FRET pair, LSS-mOrange and mKate2. (B) Spectral profile of LSSmOrange and mKate2. Orange lines present the profile of LSSmOrange and dark red lines show the one of mKate2. The dotted and solid lines are excitation and emission spectrum, respectively. The cyan line shows peak excitation wavelength of Dronpa. (C and D) Representative images (C) and the average levels of FRET/LSSmOrange emission ratios (D) in the cells expressing the RhoA biosensor together with DronpaK, PRG DHPH-DronpaK, ITSNDH, Tiam-DH or PRG DHPH domain ( $n = 13, 18, 40, 28,$  or  $152$ ,  $p$  values were calculated by Tukey's multiple comparisons test). (E) The RhoA biosensor mutants containing dominant negative (T17N) or constitutively active mutant (G14V) RhoA. (F and G) Representative images (F) and the average levels (G) of the FRET/LSS-mOrange emission ratios in the cells expressing T17N RhoA biosensor or G14V RhoA biosensor ( $p = 4.08e-27$ , by two-tailed Student's  $t$ -test,  $n = 82$  or  $90$ ).

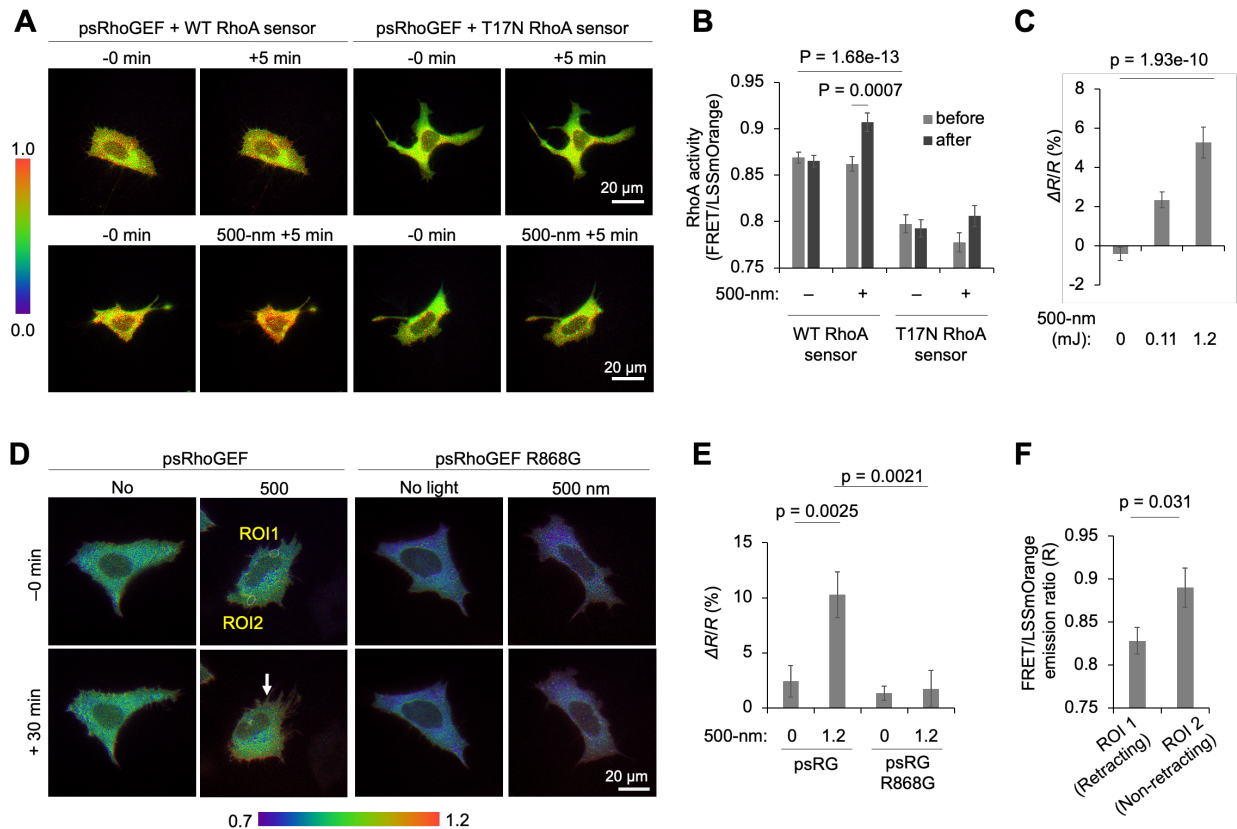

**Fig. 6. Global psRhoGEF activation induces retraction from cell edges of lower RhoA basal activity.**

(A and B) The representative images (A) and the average levels of FRET/LSSmOrange emission ratios (B) with or without 500-nm light in cells expressing psRhoGEF together with either wild type (WT) or negative mutant (T17N) RhoA sensor. (n = 36, 34, 19 or 17, p = 1.68e-13 by one-way ANOVA test, p = 0.0007 by two-tailed Student's t-test). (C) The FRET ratio changes in cells expressing psRhoGEF without or with a different light doses of illumination (p = 1.93e-10 by one-way ANOVA test, n = 36, 38 or 34). (D and F) Representative images (D) and quantification (E) showing the changes of FRET ratios with or without light stimulation in cells co-expressing psRhoGEF or psRhoGEF R868G mutant (n = 22, 42, 14, or 21). Statistical significance is calculated by two-tailed Student's t-test. (F) The FRET/LSSmOrange ratio of the RhoA biosensor in ROI1 (retracting region) and ROI2 (non-retracting region) (n = 22, p = 0.031 by two-tailed Student's t-test).

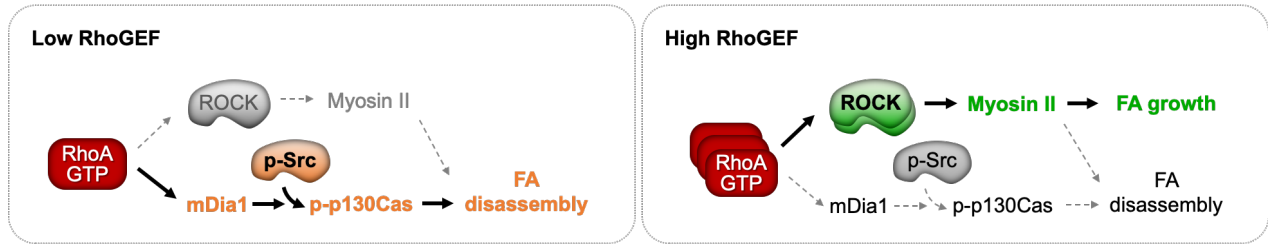

**Fig. 7. Model of RhoA signaling to FA disassembly or growth.** Left, sub-maximal activation of RhoA induces the Src activation at FAs to phosphorylate FA components such as Cas. The low amount of ROCK and myosin II activation that occurs induces contractility that is required for disassembly of FAs. Right, at higher levels of RhoA activation, the Src activation at FAs is less efficient, while ROCK and myosin II are activated to higher levels. Thus, it showed the mixed FA responses but causes the force-stimulated FA growth when the latter is inhibited.

## MATERIALS AND METHODS

### DNA construction and plasmids

Plasmids were constructed by standard molecular biology methods such as polymerase chain reaction (PCR) and In-fusion cloning (Clontech). Mutations for specific amino acids were generated by overlap-extension PCR. All cloning junctions and PCR products were verified by sequencing process. The pcDNA3 vector was used for the expression in mammalian cells, and pLL3.7 vector was used for virus production. Full plasmid sequences are available upon request, and main constructs will be available in Addgene after publication.

### Cell culture and reagents

HEK293A cells were maintained in Dulbecco's modified Eagle medium (DMEM) supplemented with 2 mM L-glutamine (GE Healthcare Life Sciences), 10% fetal bovine serum (FBS, GE Healthcare Life Sciences), 1 unit/mL penicillin (Corning), 100 g/mL streptomycin (Corning), non-essential amino acid (NEAA, Life Technologies), and 1 mM sodium pyruvate (Life Technologies). U87-MG cells were maintained in Dulbecco's modified Eagle medium (DMEM) supplemented with 2 mM L-glutamine, 10% FBS, 1 unit/mL penicillin, 100 g/mL streptomycin, and 1 mM sodium pyruvate. Cells were cultured in a humidified 95% air, 5% CO<sub>2</sub> incubator at 37°C. For the transient transfection of psRhoGEFs constructs or DronpaK, we used Lipofectamine 2000 (Life Technologies) or lentiviruses which were prepared by KIST Virus Facility. Src inhibitor PP2, ROCK inhibitor Y-27632, myosin II inhibitor Blebbistatin was purchased from Sigma.

### Live-cell imaging and analysis

For all imaging experiments, cover-glass-bottom dishes (SPL Life Sciences) were prepared by coating 10 µg/ml or indicated concentrations (for psRacGEF experiments) of fibronectin bovine protein (Invitrogen) for at least 2 hrs at 37°C. Cells expressing each construct were cultured on fibronectin-coated cover-glass-bottom dishes and incubated in media with 0.5% FBS overnight before imaging experiment. During imaging, cells were kept in the imaging chamber maintained with 5% CO<sub>2</sub> and 37°C (Live Cell Instruments). Images were collected by a Nikon Ti-E inverted microscope with Nikon C-LHGFI HG Mercury lamp and a cooled charge-coupled device camera. Cell imaging videos were produced with MetaMorph program (Molecular Devices).

Dronpa variants were imaged with a 1/8 neutral density filter, 482/35-nm excitation filter, 506-nm dichroic mirror, 536/40-nm emission filter, and 200 ms of exposure time. mCardinal-tagged Lifeact was imaged with a 1/4 neutral density (ND 4) filter, 531/40-nm excitation filter, 562-nm dichroic mirror, 593/52-nm emission filter, and 200 ms of exposure time. Time-lapse images of Lifeact were obtained every one-minute, for 10 min before photoswitch and for 50 min after photoswitch. Dronpa variants were photoswitched off by illumination on a 100× oil objective (numerical aperture 1.45, working distance 0.13 mm, Nikon) using the same excitation and dichroic filters as for imaging but without a neutral density filter for 30 seconds. For different light doses, Dronpa was photoswitched by illumination using a 100x oil objective without a neutral density filter (full dose) or 1/2, 1/4, or 1/8 neutral density (50%, 25%, or 12.5%) for 30 seconds.

Focal adhesion (FA) area for each cell at each time point was automatically calculated using the Focal Adhesion Analysis Server (FAAS) (52). Cells were categorized as showing FA growth or FA shrinkage if total FA area change during the experiment was higher than the standard deviation in the non-stimulated population.

For the FRET imaging, mKate emission from FRET was imaged by 438/24-nm excitation filter, 593-nm dichroic mirror, 641/75-nm emission filter for 200 ms of exposure time. LSSmOrange emission image was collected with 438/24-nm excitation filter, 562-nm dichroic mirror, 593/40-nm emission filter, for 200 ms of exposure time. After background subtraction, the pixel-by-pixel ratio images of FRET/LSSmOrange were calculated by the



e NIS program. The average FRET/LSSmOrange ratio in total cell area (R) or its relative change after stimulation ( $\Delta R/R$ ) were calculated for the statistical analysis of FRET responses.

Total internal reflection fluorescence (TIRF) images of mCherry-tagged paxillin before and after psRhoGEF activation were acquired under Nikon Ti-E inverted microscope equipped with fiber-coupled 488-nm and 561-nm lasers to excite Dronpa and mCherry, respectively. NIS-elements software was used for image acquisition and analysis.

### **Local control of growth cone dynamics in rat hippocampal neurons**

Primary rat hippocampal neurons were dissected on day 18 and digested with 10–20 U/mL papain (Worthington) in Hank's Balanced Salt Solution (HBSS) with 2 U/ $\mu$ L DNaseI for 25 min at 37°C. Neurons were then dissociated with Neurobasal (Life Technologies) with 10% FBS and plated on coverslips coated with poly-D-lysine (Sigma). Neurons were maintained with 5% CO<sub>2</sub> and 37°C, in Neurobasal supplemented with B27 (Life Technologies), 2 mM GlutaMAX (Life Technologies), and 10% FBS. Local control of growth cone dynamics experiment was conducted with full power of Argon laser for 350 ms on DIV 7 with a TCS SP8 confocal laser scanning microscope (Leica).

### **Rho GTPase pull-down assay**

U87-MG cells stably infected by lentiviral psRhoGEF, psRacGEF or psCdc42GEF were lysed with 1X MLB buffer (EMD Millipore) containing 25 mM (for RhoA) or 1 mM NaF or for Rac1/Cdc42), 1mM sodium orthovanadate, and protease inhibitor cocktail tablet (Roche). All samples were quantified and agitated overnight at 4°C with 23  $\mu$ l of Rhotekin RBD agarose bead (for RhoA) or 10–20  $\mu$ l of PAK-1 PBD agarose bead (for Rac1/Cdc42) (EMD Millipore). Equal amounts of protein were subject to SDS-PAGE and blotted with anti-Rho antibody (3  $\mu$ g/mL, #05-778, EMD Millipore), anti-Rac antibody, (1  $\mu$ g/mL, #05-389, EMD Millipore), anti-Cdc42 antibody (1  $\mu$ g/mL, #05-542, EMD Millipore) or anti-GAPDH antibody (1:1000 dilution, #SC47724, Santa Cruz Biotechnology). We developed western blot membranes with enhanced chemiluminescence (ECL) solution and images were captured with a luminescent image analyzer ChemiDoc (Bio-Rad, USA) or Amersham Imagequant 800 (Cytiva, USA).

### **Western blotting**

U87-MG cells infected by psRhoGEF containing lentiviruses were cultured for around 30 hrs and then starved in 0.5% FBS media for overnight. These cells were lysed with cell lysis buffer (Cell signaling) containing 1 mM PMSF, 5 mM NaF, and protease inhibitor cocktail (Cytoskeleton). Equal amounts of protein were subject to SDS-PAGE and blotted with polyclonal anti-phosphorylated ROCK2 (Ser1366) antibody (1.3  $\mu$ g/mL, #ab228008, Abcam) or polyclonal anti-ROCK2 antibody (1:1000 dilution, #8236, Cell Signaling Technology). We developed western blot membranes with enhanced chemiluminescence (ECL) solution and images were captured with a luminescent image analyzer ChemiDoc (Bio-Rad, USA).

### **Immunostaining**

Paxillin-mTagBFP and psRhoGEF co-expressed cells were fixed with 4% paraformaldehyde for 10 min, and permeabilized with 0.1% triton X-100 for 15 min. Cells were incubated in 5% BSA in PBS for 1 hr, and then with rabbit anti-phospho Src Tyr416 (0.69  $\mu$ g/mL, #2101, Cell Signaling), rabbit anti-Src (1.39  $\mu$ g/mL, #2109, Cell Signaling), or rabbit anti-phospho myosin light chain 2 Thr18/Ser19 (0.2  $\mu$ g/mL, #3674, Cell Signaling) antibody for overnight at 4°C. After three times of washing with PBS, cells were incubated with goat anti-rabbit antibody conjugated to Alexa-fluor 594 (20  $\mu$ g/mL, #A-11037, Thermo Fisher Scientific) for 1 hr. After three times of washing with PBS for 10 min each, the stained cells were mounted and observed under a TIRF microscopy. For quantifying of p-Src and c-Src at focal adhesions, the TIRF images of p-Src and paxillin-mTagBFP of t

he same cell were applied to the Pearson's correlation test via NIS program (Nikon).

### Statistical tests

P values were calculated using two-tailed Student's t-test, the Dunnett's multiple comparisons test, one-way ANOVA test or Tukey's multiple comparisons test (GraphPad Prism 8) for continuous variables, following confirmation of normality calculated by the Shapiro-Wilk test calculator (Statistics Kingdom), or using Fisher's exact test calculator (Social Science Statistics, 2018) for categorical variables.

### REFERENCES

1. C. D. Nobes, A. Hall, Rho, rac, and cdc42 GTPases regulate the assembly of multimolecular focal complexes associated with actin stress fibers, lamellipodia, and filopodia. *Cell* **81**, 53-62 (1995).
2. S. J. Heasman, A. J. Ridley, Multiple roles for RhoA during T cell transendothelial migration. *Small GTPases* **1**, 174-179 (2010).
3. M. Machacek, L. Hodgson, C. Welch, H. Elliott, O. Pertz, P. Nalbant, A. Abell, G. L. Johnson, K. M. Hahn, G. Danuser, Coordination of Rho GTPase activities during cell protrusion. *Nature* **461**, 99-103 (2009).
4. O. Pertz, L. Hodgson, R. L. Klemke, K. M. Hahn, Spatiotemporal dynamics of RhoA activity in migrating cells. *Nature* **440**, 1069-1072 (2006).
5. K. Wong, O. Pertz, K. Hahn, H. Bourne, Neutrophil polarization: spatiotemporal dynamics of RhoA activity support a self-organizing mechanism. *Proc Natl Acad Sci U S A* **103**, 3639-3644 (2006).
6. J. T. Parsons, A. R. Horwitz, M. A. Schwartz, Cell adhesion: integrating cytoskeletal dynamics and cellular tension. *Nat Rev Mol Cell Biol* **11**, 633-643 (2010).
7. F. E. Lock, K. R. Ryan, N. S. Poulter, M. Parsons, N. A. Hotchin, Differential regulation of adhesion complex turnover by ROCK1 and ROCK2. *PLoS One* **7**, e31423 (2012).
8. N. Yamana, Y. Arakawa, T. Nishino, K. Kurokawa, M. Tanji, R. E. Itoh, J. Monypenny, T. Ishizaki, H. Bito, K. Nozaki, N. Hashimoto, M. Matsuda, S. Narumiya, The Rho-mDia1 pathway regulates cell polarity and focal adhesion turnover in migrating cells through mobilizing Apc and c-Src. *Mol Cell Biol* **26**, 6844-6858 (2006).
9. N. O. Carragher, M. C. Frame, Focal adhesion and actin dynamics: a place where kinases and proteases meet to promote invasion. *Trends Cell Biol* **14**, 241-249 (2004).
10. D. J. Webb, K. Donais, L. A. Whitmore, S. M. Thomas, C. E. Turner, J. T. Parsons, A. F. Horwitz, FAK-Src signalling through paxillin, ERK and MLCK regulates adhesion disassembly. *Nat Cell Biol* **6**, 154-161 (2004).
11. M. Amano, K. Chihara, K. Kimura, Y. Fukata, N. Nakamura, Y. Matsuura, K. Kaibuchi, Formation of actin stress fibers and focal adhesions enhanced by Rho-kinase. *Science* **275**, 1308-1311 (1997).
12. P. W. Oakes, Y. Beckham, J. Stricker, M. L. Gardel, Tension is required but not sufficient for focal adhesion maturation without a stress fiber template. *J Cell Biol* **196**, 363-374 (2012).
13. L. M. Meenderink, L. M. Ryzhova, D. M. Donato, D. F. Gochberg, I. Kaverina, S. K. Hanks, P130Cas Src-binding and substrate domains have distinct roles in sustaining focal adhesion disassembly and promoting cell migration. *PLoS One* **5**, e13412 (2010).
14. J. Stricker, Y. Beckham, M. W. Davidson, M. L. Gardel, Myosin II-mediated focal adhesion maturation is tension insensitive. *PLoS One* **8**, e70652 (2013).
15. H. Wolfenson, A. Bershadsky, Y. I. Henis, B. Geiger, Actomyosin-generated tension controls the molecular kinetics of focal adhesions. *J Cell Sci* **124**, 1425-1432 (2011).
16. K. Burridge, C. Guilluy, Focal adhesions, stress fibers and mechanical tension. *Exp Cell Res* **343**, 14-20 (2016).
17. L. J. Bugaj, A. T. Choksi, C. K. Mesuda, R. S. Kane, D. V. Schaffer, Optogenetic protein clustering and signaling activation in mammalian cells. *Nat Methods* **10**, 249-252 (2013).

18. H. Wang, M. Vilela, A. Winkler, M. Tarnawski, I. Schlichting, H. Yumerefendi, B. Kuhlman, R. Liu, G. Danuser, K. M. Hahn, LOVTRAP: an optogenetic system for photoinduced protein dissociation. *Nat Methods* **13**, 755-758 (2016).
19. D. Michaelson, J. Silletti, G. Murphy, P. D'Eustachio, M. Rush, M. R. Philips, Differential localization of Rho GTPases in live cells: regulation by hypervariable regions and RhoGDI binding. *J Cell Biol* **152**, 111-126 (2001).
20. E. Boulter, R. Garcia-Mata, RhoGDI: A rheostat for the Rho switch. *Small GTPases* **1**, 65-68 (2010).
21. W. P. Bozza, Y. Zhang, K. Hallett, L. A. Rivera Rosado, B. Zhang, RhoGDI deficiency induces constitutive activation of Rho GTPases and COX-2 pathways in association with breast cancer progression. *Oncotarget* **6**, 32723-32736 (2015).
22. L. Luo, Rho GTPases in neuronal morphogenesis. *Nat Rev Neurosci* **1**, 173-180 (2000).
23. K. L. Rossman, C. J. Der, J. Sondek, GEF means go: turning on RHO GTPases with guanine nucleotide-exchange factors. *Nat Rev Mol Cell Biol* **6**, 167-180 (2005).
24. P. R. O'Neill, V. Kalyanaraman, N. Gautam, Subcellular optogenetic activation of Cdc42 controls local and distal signaling to drive immune cell migration. *Mol Biol Cell* **27**, 1442-1450 (2016).
25. E. Wagner, M. Glotzer, Local RhoA activation induces cytokinetic furrows independent of spindle position and cell cycle stage. *J Cell Biol* **213**, 641-649 (2016).
26. L. Valon, A. Marin-Llaurado, T. Wyatt, G. Charras, X. Trepas, Optogenetic control of cellular forces and mechanotransduction. *Nat Commun* **8**, 14396 (2017).
27. X. X. Zhou, H. K. Chung, A. J. Lam, M. Z. Lin, Optical control of protein activity by fluorescent protein domains. *Science* **338**, 810-814 (2012).
28. X. X. Zhou, L. Z. Fan, P. Li, K. Shen, M. Z. Lin, Optical control of cell signaling by single-chain photoswitchable kinases. *Science* **355**, 836-842 (2017).
29. M. Jaiswal, L. Gremer, R. Dvorsky, L. C. Haeusler, I. C. Cirstea, K. Uhlenbrock, M. R. Ahmadian, Mechanistic insights into specificity, activity, and regulatory elements of the regulator of G-protein signaling (RGS)-containing Rho-specific guanine nucleotide exchange factors (GEFs) p115, PDZ-RhoGEF (PRG), and leukemia-associated RhoGEF (LARG). *J Biol Chem* **286**, 18202-18212 (2011).
30. A. Oleksy, L. Opalinski, U. Derewenda, Z. S. Derewenda, J. Otlewski, The molecular basis of RhoA specificity in the guanine nucleotide exchange factor PDZ-RhoGEF. *J Biol Chem* **281**, 32891-32897 (2006).
31. J. A. Bielnicki, A. V. Shkumatov, U. Derewenda, A. V. Somlyo, D. I. Svergun, Z. S. Derewenda, Insights into the molecular activation mechanism of the RhoA-specific guanine nucleotide exchange factor, PDZRhoGEF. *J Biol Chem* **286**, 35163-35175 (2011).
32. R. Kristelly, G. Gao, J. J. Tesmer, Structural determinants of RhoA binding and nucleotide exchange in leukemia-associated Rho guanine-nucleotide exchange factor. *J Biol Chem* **279**, 47352-47362 (2004).
33. A. J. Lam, F. St-Pierre, Y. Gong, J. D. Marshall, P. J. Cranfill, M. A. Baird, M. R. McKeown, J. Wiedenmann, M. W. Davidson, M. J. Schnitzer, R. Y. Tsien, M. Z. Lin, Improving FRET dynamic range with bright green and red fluorescent proteins. *Nat Methods* **9**, 1005-1012 (2012).
34. K. Jalink, E. J. van Corven, T. Hengeveld, N. Morii, S. Narumiya, W. H. Moolenaar, Inhibition of lysophosphatidate- and thrombin-induced neurite retraction and neuronal cell rounding by ADP ribosylation of the small GTP-binding protein Rho. *J Cell Biol* **126**, 801-810 (1994).
35. G. Gallo, RhoA-kinase coordinates F-actin organization and myosin II activity during semaphorin-3A-induced axon retraction. *J Cell Sci* **119**, 3413-3423 (2006).
36. S. M. Shamah, M. Z. Lin, J. L. Goldberg, S. Estrach, M. Sahin, L. Hu, M. Bazalakova, R. L. Neve, G. Corfas, A. Debant, M. E. Greenberg, EphA receptors regulate growth cone dynamics through the novel guanine nucleotide exchange factor ephexin. *Cell* **105**, 233-244 (2001).
37. A. Hall, G. Lalli, Rho and Ras GTPases in axon growth, guidance, and branching. *Cold Spring Harb Perspect Biol* **2**, a001818 (2010).

38. A. J. Ridley, H. F. Paterson, C. L. Johnston, D. Diekmann, A. Hall, The small GTP-binding protein rac regulates growth factor-induced membrane ruffling. *Cell* **70**, 401-410 (1992).
39. X. D. Ren, W. B. Kiosses, D. J. Sieg, C. A. Otey, D. D. Schlaepfer, M. A. Schwartz, Focal adhesion kinase suppresses Rho activity to promote focal adhesion turnover. *J Cell Sci* **113 (Pt 20)**, 3673-3678 (2000).
40. J. Seong, A. Tajik, J. Sun, J. L. Guan, M. J. Humphries, S. E. Craig, A. Shekaran, A. J. Garcia, S. Lu, M. Z. Lin, N. Wang, Y. Wang, Distinct biophysical mechanisms of focal adhesion kinase mechanoactivation by different extracellular matrix proteins. *Proc Natl Acad Sci USA* **110**, 19372-19377 (2013).
41. H. F. Paterson, A. J. Self, M. D. Garrett, I. Just, K. Aktories, A. Hall, Microinjection of recombinant p21rho induces rapid changes in cell morphology. *J Cell Biol* **111**, 1001-1007 (1990).
42. M. Amano, M. Nakayama, K. Kaibuchi, Rho-kinase/ROCK: A key regulator of the cytoskeleton and cell polarity. *Cytoskeleton (Hoboken)* **67**, 545-554 (2010).
43. H. Machiyama, H. Hirata, X. K. Loh, M. M. Kanchi, H. Fujita, S. H. Tan, K. Kawachi, Y. Sawada, Displacement of p130Cas from focal adhesions links actomyosin contraction to cell migration. *J Cell Sci* **127**, 3440-3450 (2014).
44. Y. Sawada, M. Tamada, B. J. Dubin-Thaler, O. Cherniavskaya, R. Sakai, S. Tanaka, M. P. Sheetz, Force sensing by mechanical extension of the Src family kinase substrate p130Cas. *Cell* **127**, 1015-1026 (2006).
45. W. Wang, Y. Liu, K. Liao, Tyrosine phosphorylation of cortactin by the FAK-Src complex at focal adhesions regulates cell motility. *BMC Cell Biol* **12**, 49 (2011).
46. R. D. Fritz, M. Letzelter, A. Reimann, K. Martin, L. Fusco, L. Ritsma, B. Ponsioen, E. Fluri, S. Schulte-Merker, J. van Rheenen, O. Pertz, A versatile toolkit to produce sensitive FRET biosensors to visualize signaling in time and space. *Sci Signal* **6**, rs12 (2013).
47. S. Narumiya, M. Tanji, T. Ishizaki, Rho signaling, ROCK and mDia1, in transformation, metastasis and invasion. *Cancer Metastasis Rev* **28**, 65-76 (2009).
48. Y. Arakawa, H. Bito, T. Furuyashiki, T. Tsuji, S. Takemoto-Kimura, K. Kimura, K. Nozaki, N. Hashimoto, S. Narumiya, Control of axon elongation via an SDF-1alpha/Rho/mDia pathway in cultured cerebellar granule neurons. *J Cell Biol* **161**, 381-391 (2003).
49. T. Dimauro, G. David, Ras-induced senescence and its physiological relevance in cancer. *Curr Cancer Drug Targets* **10**, 869-876 (2010).
50. H. A. Kestler, M. Kuhl, Generating a Wnt switch: it's all about the right dosage. *J Cell Biol* **193**, 431-433 (2011).
51. A. Sagner, J. Briscoe, Morphogen interpretation: concentration, time, competence, and signaling dynamics. *Wiley Interdiscip Rev Dev Biol* **6**, (2017).
52. M. E. Berginski, S. M. Gomez, The Focal Adhesion Analysis Server: a web tool for analyzing focal adhesion dynamics. *F1000Res* **2**, 68 (2013).

## Acknowledgments

**Funding:** This work is supported by KIST Institutional Grant 2E30963, Brain Research Program through the National Research Foundation of Korea (2017M3C7A1043842), Samsung Research Funding & Incubation Center of Samsung Electronics under Project Number SRFC-TC2003-02 (J.S.), the Stanford Department of Bioengineering (A.L.R.) and a NIH Pioneer Award (L.N., X.X.Z., M.Z.L.).

**Author contributions:** J.S. and M.Z.L. designed research; J.S., J.J., L.N., H.N.L, H.C., X.X.Z., H.R., Y.W.L, A.L.-R. performed experiments; J.S., M.Z.L., J.J, L.N., C. J. analyzed data; J.S. and M.Z.L. wrote the manuscript.

**Competing interests:** The authors declare no conflicts of interest.

**Data and materials availability:** All data needed to evaluate the conclusions in the paper are present in the paper and the Supplementary Materials. Additional data related to this paper may be requested from the authors.
